1 **High abundance of transcription regulators compacts the nucleoid in**  
2 ***Escherichia coli***

3

4 Cihan Yilmaz and Karin Schnetz\*

5 Institute for Genetics, University of Cologne, Zùlpicher Str. 47a, 50674 Cologne, Germany

6 \*Corresponding author: [schnetz@uni-koeln.de](mailto:schnetz@uni-koeln.de), +49-221-4703815

7

8 Keywords: transcription regulator, nucleoid structure, nucleoid compaction, nucleoid-  
9 associated protein

10

11 Running title: Nucleoid compaction by abundant DNA-binding proteins

## 12 **Abstract**

13 In enteric bacteria organization of the circular chromosomal DNA into a highly dynamic and  
14 toroidal shaped nucleoid involves various factors such as DNA supercoiling, nucleoid-  
15 associated proteins (NAPs), the structural maintenance of chromatin (SMC) complex, and  
16 macro-domain organizing proteins. Here we show that ectopic expression of transcription  
17 regulators at high levels leads to nucleoid compaction. This serendipitous result was obtained  
18 by fluorescence microscopy upon ectopic expression of the transcription regulator and  
19 phosphodiesterase PdeL of *Escherichia coli* of a strain expressing the mCherry-tagged HU- $\alpha$   
20 subunit (HupA) for nucleoid staining. Nucleoid compaction by PdeL depends on DNA-binding,  
21 but not on its enzymatic phosphodiesterase activity. Nucleoid compaction was also observed  
22 upon high-level ectopic expression of the transcription regulators LacI, RutR, RcsB, LeuO and  
23 Cra, which range from single target gene regulators to global regulators. In case of LacI its  
24 high-level expression in presence of the gratuitous inducer IPTG also led to nucleoid  
25 compaction indicating that compaction is caused by unspecific DNA-binding. In all cases  
26 nucleoid compaction correlated with misplacement of the FtsZ ring and loss of MukB foci, a  
27 subunit of the SMC complex. Thus, high levels of several transcription regulators cause  
28 nucleoid compaction with consequences on transcription, replication, and cell division.

## 29 **Importance**

30 The bacterial nucleoid is a highly organized and dynamic structure for simultaneous,  
31 transcription, replication and segregation of the bacterial genome. Compaction of the  
32 nucleoid and disturbance of DNA segregation and cell division by artificially high levels of  
33 transcription regulators, as described here, reveals that an excess of DNA-binding protein  
34 disturbs nucleoid structuring. The results suggest that ectopic expression levels of DNA-  
35 binding proteins for genetic studies of their function but also for their purification should be  
36 carefully controlled and adjusted.

## 37 Introduction

38 Regulation of transcription in *Escherichia coli* involves a repertoire of approximately 300  
39 transcription regulators of which more than 90% have been functionally validated (1-3). These  
40 transcription regulators include single target regulators such as LacI solely regulating the *lac*  
41 operon, local regulators with up to 50 target genes as for example RutR, a pyrimidine  
42 utilization repressor (4), and global regulators such as the catabolite activator repressor  
43 protein Cra and the pleiotropic regulator LeuO with more than 100 targets (5, 6). Nucleoid-  
44 associated proteins (NAPs) constitute a further group of DNA-binding proteins; they are  
45 abundant, relevant for organization of the genomic DNA as a nucleoid, and participate in the  
46 regulation of hundreds of targets genes (7).

47 PdeL, carrying a N-terminal FixJ/NarL/LuxR-type DNA-binding domain and a C-terminal EAL-  
48 type c-di-GMP-specific phosphodiesterase domain, is one of the validated transcriptional  
49 regulators with a small number of target loci including the *fliFGHIK* operon, *ssIE*, and *pdeL*  
50 itself (8, 9). However, the physiological function of PdeL remains an open question, as a *pdeL*  
51 deletion mutant has no significant phenotype at least at the laboratory growth conditions (9).  
52 At these growth conditions expression of the *pdeL* gene and concomitantly PdeL protein levels  
53 are low, due to repression of *pdeL* by the abundant nucleoid-associated and global repressor  
54 protein H-NS (9, 10). However, moderately elevated PdeL levels using plasmids or up-  
55 regulated *pdeL* mutants disclosed its function as transcription regulator and as active c-di-  
56 GMP specific phosphodiesterase (8, 9). Furthermore, PdeL, as a dual function protein may  
57 represent a trigger enzyme whose role as transcription regulator is controlled by c-di-GMP via  
58 the phosphodiesterase domain (11).

59 Considering the dual functions of PdeL we used a fluorescent protein fusion, PdeL-mVenus,  
60 provided by a pBAD-derived plasmid to analyze its cellular localization. Serendipitously, we  
61 found that ectopic expression of PdeL causes nucleoid compaction even upon weak induction  
62 of the *P<sub>ara</sub>* promoter directing expression of *pdeL-mVenus*. Weak induction nonetheless led to  
63 high levels of PdeL, which is a very stable protein. Further, other transcription regulators (LacI,  
64 RutR, RcsB, LeuO, and Cra) all cause compaction of the nucleoid as well, when expressed and  
65 synthesized at similarly high levels. The data indicate that the mere occupation of the genomic  
66 DNA by an abundant DNA-binding protein can have severe effects on nucleoid structuring.

## 67 Results

### 68 PdeL is nucleoid-associated and causes nucleoid compaction

69 Here we addressed whether the dual function protein PdeL is predominantly nucleoid-  
70 associated or localized otherwise. To this end, PdeL-mVenus fusions were provided by  
71 plasmids under control of the *P<sub>ara</sub>* promoter, and the cellular localization was analyzed by  
72 fluorescence microscopy in *E. coli hupA-mCherry ΔpdeL* strain U159 (Fig. 1A, Tables 1 and 2).  
73 In this strain gradual induction of *P<sub>ara</sub>* by arabinose is applicable due to modification of the  
74 arabinose regulon, as described (12, 13), while HupA-fluorescent protein fusions are well-  
75 established markers for nucleoid imaging (14, 15). Cellular localization of PdeL-mVenus and  
76 of PdeL<sub>H<sub>TH5M</sub></sub>-mVenus, a mutant defective in DNA-binding as a control, was analyzed (9). Note  
77 that chromosomal encoded PdeL-mVenus is not detectable by fluorescence microscopy due  
78 to low expression of the *pdeL* gene (9).

79 First, we determined the L-arabinose concentration needed for inducing the synthesis of  
80 equal amounts of PdeL and the DNA-binding defective control PdeL<sub>H<sub>TH5M</sub></sub> by using 3xFLAG  
81 alleles carried on the same plasmidic expression system as used for fluorescence microscopy  
82 (Fig. S1). PdeL-3xFLAG gene expression was induced with 2 μM L-arabinose, while expression  
83 of PdeL<sub>H<sub>TH5M</sub></sub>-3xFLAG was induced by addition of increasing concentrations of L-arabinose.  
84 The amount of PdeL-3xFLAG (induced by addition of 2 μM L-arabinose) and PdeL<sub>H<sub>TH5M</sub></sub>-3xFLAG  
85 (induced with 20 μM L-arabinose) were similar (Fig. S1). The low concentration of L-arabinose  
86 that is required for synthesis of significant amounts of PdeL indicates that PdeL synthesis is  
87 efficient and that the PdeL protein is stable. Determination of the protein stability of PdeL  
88 and PdeL<sub>H<sub>TH5M</sub></sub> showed that PdeL-3xFLAG was stable for 160 minutes after inhibition of  
89 translation by 100 μg/ml chloramphenicol (Fig. S1). In contrast, the PdeL<sub>H<sub>TH5M</sub></sub>-3xFLAG steady  
90 state level was lower and its level decreased approximately 2-fold in the 160 minutes after  
91 inhibition of translation, which suggests that PdeL<sub>H<sub>TH5M</sub></sub> is less stable than PdeL (Fig. S1). Note  
92 that protein stability was determined without induction to keep PdeL-levels sufficiently low  
93 for quantification (Fig. S1). The result of the protein stability assay is in accordance with the  
94 different concentrations of L-arabinose that are required for similar steady state protein  
95 levels of PdeL-3xFLAG and PdeL<sub>H<sub>TH5M</sub></sub>-3xFLAG.

96 For fluorescence microscopy plasmidic *P<sub>ara</sub>*-directed expression of *pdeL-Venus* and *pdeL<sub>HTH5M</sub>-*  
97 *mVenus* was induced by L-arabinose after one hour of growth ( $t = 1h$ ), and samples were  
98 harvested after one and two additional hours of growth (at  $t=2h$  and  $t=3h$ ) later (Fig. 1). PdeL-  
99 mVenus fluorescence was apparent after one hour of induction and localized to the whole  
100 nucleoid (Fig. 1B and Fig. S2). In addition, nucleoid-association was accompanied by nucleoid  
101 compaction, formation of nucleoid free areas near the cell poles, and an enlargement of the  
102 bacteria. In contrast, PdeL<sub>HTH5M</sub>-mVenus was located diffusely in the cell, and after two hours  
103 of induction, aggregates of PdeL<sub>HTH5M</sub>-mVenus near the cell pole became apparent. Taken  
104 together, the data suggest that the transcription regulator PdeL is nucleoid-associated and  
105 they indicate that DNA-binding by high PdeL levels cause nucleoid compaction.

### 106 **PdeL and RcsB compact the nucleoid and affect localization of MukB-mNeonGreen**

107 PdeL-mVenus leads to nucleoid compaction close to midcell. Since the nucleoid structure is  
108 changed, we tested localization of MukB, a subunit of the structural maintenance of  
109 chromosome (SMC) complex and a marker for *oriC* localization, using chromosomally  
110 encoded MukB-mNeonGreen (MukB-mNG) (16-19). In addition, FtsZ-mNG was used as a  
111 marker for septum formation (for results see below). In this experimental approach,  
112 transformants expressing non-tagged PdeL, the DNA-binding defective, PdeL<sub>HTH5M</sub>, and an  
113 enzymatically inactive PdeL<sub>EVL-AAA</sub> were studied (Fig. 2A). PdeL<sub>EVL-AAA</sub> is enzymatically inactive  
114 due to mutation of the conserved c-di-GMP-specific EVL motif to three alanine residues. In  
115 addition to PdeL, high level expression of the two-component response regulator RcsB was  
116 included, which like PdeL carries a FixJ/NarL/LuxR-type DNA-binding domain, to analyze  
117 whether nucleoid compaction by high protein levels is PdeL-specific.

118 First, synthesis of RcsB levels that are similar to the levels of PdeL were established using  
119 plasmids carrying 3xFLAG-tagged *rcsB* alleles under *P<sub>ara</sub>* control (Fig. S3). In these plasmids the  
120 efficiency of translation of *rcsB-3xFLAG* was varied. RcsB-3xFLAG levels were lowest with its  
121 native ribosomal binding site (RBS), higher when *rcsB* was fused to *pdeL*'s RBS, and similarly  
122 high as PdeL levels when using the phage *T7 gene10* RBS and 50  $\mu$ M of L-arabinose for  
123 induction (Fig. S3).

124 Next, fluorescence microscopy was performed using transformants of *hupA-mCherry mukB-*  
125 *mNG  $\Delta$ pdeL* strain U477 with plasmids coding for PdeL, PdeL<sub>HTH5M</sub>, PdeL<sub>EVL-AAA</sub>, and RcsB,

126 respectively. These transformants synthesized approximately equal amounts of PdeL,  
127 PdeL<sub>H<sub>5</sub>M</sub>, PdeL<sub>EVL-AAA</sub> and RcsB upon induction by L-arabinose, as shown by SDS-PAGE (Fig.  
128 2A). Induction of high levels of PdeL, PdeL<sub>EVL-AAA</sub>, and RcsB synthesis caused nucleoid  
129 compaction to midcell and a moderate increase of the cell length (Fig. 2B). Furthermore, one  
130 or two MukB-mNG foci close to *oriC* were detectable without induction and in the control  
131 (Fig. 2B and Fig. S4), as previously shown for fluorescent protein MukB fusions (17). MukB-  
132 mNG foci disappeared upon induction of PdeL, PdeL<sub>EVL-AAA</sub>, and RcsB expression, but were not  
133 changed in case of the DNA-binding deficient PdeL<sub>H<sub>5</sub>M</sub> (Fig. 2B). The disappearance of MukB-  
134 mNG foci was not caused by a change in the MukB protein levels, which remained constant  
135 (Fig. S5). Taken together, high protein levels of PdeL and RcsB, but not of the DNA-binding  
136 defective PdeL<sub>H<sub>5</sub>M</sub> mutant led to nucleoid compaction and loss of MukB-mNG foci.

### 137 **High levels of PdeL and RcsB proteins lead to misplacement of the FtsZ ring**

138 As a second marker we tested whether localization of cell division protein FtsZ is affected by  
139 synthesis of high levels of PdeL and RcsB. For visualization of the Z-ring in *ftsZ*<sup>+</sup> background,  
140 FtsZ-mNG was provided by a low-copy plasmid carrying a *P<sub>lacUV5</sub>* *ftsZ-mNG* cassette, as  
141 described (20). The low activity of the non-induced *P<sub>lacUV5</sub>* promoter was sufficient for  
142 production of detectable amounts of FtsZ-mNG. Fluorescence microscopy was performed  
143 with double transformants of *hupA-mCherry ΔpdeL* strain U159 with the *ftsZ-mNG* plasmid  
144 and compatible *pdeL* or *rcsB* carrying plasmids (Fig. 3). Depending on the progression of the  
145 cell cycle, FtsZ-mNG was detectable at midcell forming the Z-ring, in case of the control and  
146 the PdeL<sub>H<sub>5</sub>M</sub> DNA-binding mutant (Fig. 3 and Fig. S6). Localization of FtsZ-mNG was different  
147 when PdeL and when RcsB were expressed at high levels. In these cases, the FtsZ was  
148 displaced from mid-cell towards the quarter positions which are devoid of the nucleoid (Fig.  
149 3 and Fig. S6). Taken together, the FtsZ ring is misplaced by high levels of PdeL, PdeL<sub>EVL-AAA</sub>,  
150 and RcsB, but not by the DNA-binding defective PdeL<sub>H<sub>5</sub>M</sub> (Fig. 3 and Fig. S6).

### 151 **High levels of the transcription regulators LacI, RutR, LeuO, and Cra also cause** 152 **nucleoid compaction**

153 Since high levels of both PdeL and RcsB affect the nucleoid structure and localization of MukB  
154 and FtsZ, we tested additional DNA-binding proteins. This included the single target  
155 transcription regulator LacI, the local regulator RutR, and the global regulators LeuO and Cra

156 (6). Plasmidic  $P_{ara}$  directed expression of these transcription regulators was adjusted to obtain  
157 approximately equal amounts of each protein, as validated by SDS-PAGE (Fig. S7).  
158 Fluorescence microscopy demonstrated that high levels of all transcription regulators, LacI,  
159 RutR, LeuO, and Cra, caused nucleoid compaction as well (Fig. 4 and Fig. S8). In addition, we  
160 also analyzed whether LacI in presence of IPTG causes the same phenotype. Specific DNA-  
161 binding of LacI is inhibited by IPTG (21). Non-specific DNA-binding of high levels of LacI-IPTG  
162 was sufficient to cause compaction of the nucleoid (Fig. 5 and S9). In all cases the number of  
163 MukB-mNG foci was significantly lower (Figs. 4, 5, S8, and S10). Taken together, all tested  
164 transcription regulators LacI, RutR, LeuO, and Cra caused nucleoid compaction and a decrease  
165 of MukB-mNG foci similar to PdeL and RcsB.

166 For RutR, LeuO and Cra we also tested FtsZ localization using low-copy plasmid carrying *ftsZ*-  
167 *mNG* under control of the LacI-regulated *lacUV5* promoter (Fig. 6 and S10). In this experiment  
168 LacI could not be included, since high levels of LacI led to complete inhibition of *ftsZ-mNG*  
169 expression. Fluorescence microscopy of the transformants expressing high levels of RutR,  
170 LeuO and Cra, respectively, caused misplacement of the FtsZ similarly as PdeL and RcsB (Fig.  
171 6).

172 Lastly, the amount of PdeL that is synthesized upon induction of  $P_{ara}$  by 2  $\mu$ M L-arabinose was  
173 estimated using purified PdeL-His<sub>6</sub> as a reference (Fig. S11). After one hour of induction,  
174 approximately 40,000 PdeL monomers and after two hours of induction approximately  
175 150,000 monomers of PdeL are present per cell, which corresponds to one PdeL dimer per  
176 250 bp after one hour and four PdeL dimers per 250 bp after two hours of induction (assuming  
177 that a single non-replicating nucleoid is present).



## 178 Discussion

179 Here we have shown that high levels of the transcription regulators PdeL, RcsB, Lacl, RutR,  
180 Cra, and LeuO lead to nucleoid compaction in *E. coli*. These transcription regulators include  
181 single target and local regulators with only one or few specific DNA-binding sites and global  
182 regulators with hundreds of DNA-binding sites in the genome (6). Our data suggest that  
183 nucleoid compaction is caused by non-specific occupancy of the genomic DNA. Comparable  
184 observations of nucleoid compaction have been described recently for the phage T4 protein  
185 MotB and for the bacterial DNA-binding toxin SymE (22, 23).

186 The dual function protein PdeL, a transcription regulator and c-di-GMP specific  
187 phosphodiesterase, is nucleoid-associated. Further, ectopic expression of *pdeL* directed by  
188 weak induction of *P<sub>ara</sub>* resulted in a high cellular protein level, apparently because PdeL is a  
189 protein of high stability. The high level of PdeL caused nucleoid compaction. Likewise, the  
190 two-component response regulator RcsB, which carries a FixJ/NarL/LuxR-type DNA-binding  
191 domain like PdeL, caused nucleoid compaction, when expressed at similarly high levels as  
192 PdeL. Other transcription regulators led to nucleoid compaction as well, and this is  
193 independent of the number of specific DNA-binding sites, as shown with the single target  
194 regulator Lacl, the local regulator RutR, and the global regulators Cra and LeuO (5, 6). In case  
195 of Lacl nucleoid compaction is independent of specific DNA-binding as shown using the  
196 gratuitous inducer IPTG.

197 The high level of PdeL with approximately 40,000 molecules per cell one hour after induction  
198 corresponds to one dimer per 250 bp, while the approximately 150,000 molecules present  
199 after two hours of ectopic synthesis would theoretically allow complete coverage of the  
200 genome. The cellular levels of the other transcription regulators tested in this study are  
201 comparable. Occupancy of the whole genome by a DNA-binding could hinder DNA replication  
202 and/or transcription. In case of the toxin SymE it has been shown that toxicity of *symE*  
203 overexpression is presumably based on nucleoid condensation and inhibition of DNA as well  
204 as RNA synthesis (23). Further, these authors have shown that nucleoid compaction caused  
205 by synthesis of SymE at high levels is similar to nucleoid compaction caused by overexpression  
206 of H-NS (23, 24). Such a mechanism of genome silencing is possibly utilized by phage T4, which  
207 encodes the protein MotB that shortly after infection is synthesized at very high levels  
208 corresponding to 40,000 monomers per cell (22). In case of phage T4 MotB, fluorescence

209 imaging using a MotB-GFP fusion demonstrated nucleoid compaction (22) similar to the data  
210 shown in this work. Interestingly, MotB has dramatic effects on the transcriptome leading to  
211 a relative increase of 1/8 of all transcripts in relation to the whole transcriptome, and of these  
212 1/8 of the transcriptome ~70% correspond to H-NS repressed genes (22, 25). Thus, phage T4  
213 apparently employs the abundance of MotB to re-program the host transcriptome (22).  
214 Remarkably, nucleoid-associated proteins (NAPs) such as H-NS, HU, IHF, and FIS and others  
215 are abundant (26), but at their natural level they do not cause nucleoid compaction. H-NS,  
216 present at approximately 20,000 molecules per cell binds to the minor groove of AT-rich DNA  
217 and forms linear and bridged filaments. HU and IHF are likewise abundant and DNA-bending  
218 proteins that presumably contribute to nucleoid structuring and formation of specific  
219 regulatory nucleoprotein complexes. FIS is expressed at very high levels with 50,000  
220 molecules per cell during the early exponential growth phase only; it is a DNA-bending protein  
221 and organizer of plectonemic structures (7, 27). The cellular levels of the abundant NAPs is  
222 apparently well adjusted to their function.

223 Our data suggest that compaction of the nucleoid by the transcription regulators displaces Z-  
224 rings from mid-cell towards the cell poles. Exclusion of the Z-ring from midcell can be an  
225 indirect effect mediated by the nucleoid occlusion system and SlmA protein (28). Similarly,  
226 the loss of detectable MukB-mNeonGreen foci near the origin of replication can be an indirect  
227 consequence of nucleoid compaction, as it is possible that DNA replication is put on hold by  
228 excessive occupancy of the genome by overexpressed transcription regulators. In accordance  
229 with an indirect effect, the change in positioning of MukB and the FtsZ is observed later than  
230 nucleoid compaction.

231 The serendipitous finding reported here emphasizes the importance of using native protein  
232 levels in functional analysis of transcription regulators. Another aspect to be considered when  
233 using ectopic expression is that the level of a transcription regulator and the number of its  
234 specific DNA-binding sites in the genome is balanced (29). Ectopic expression can be required  
235 for a functional analysis, as for example when conditions leading to expression of the gene  
236 encoding a transcription regulator and an inducer are not known. In case of transcription  
237 regulators that are stable, such as PdeL, ectopic expression even for a short time and with a  
238 low inducer concentration may yield far too high protein levels. Thus, if an ectopic expression

239 system is used, the rate and duration of synthesis as well as the protein stability and cellular  
240 level should be controlled carefully.

## 241 **Material and Methods**

### 242 **Bacterial strains media and plasmids**

243 *E. coli* K12 strains and their construction are described in Table 1. Strains were constructed  
244 by transduction using phage T4GT7 or P1 *vir*, and by Lambda-Red-mediated recombineering,  
245 respectively (30-33). Plasmids are listed in Table 2 and oligonucleotides used for construction  
246 of strains and plasmids are listed in supplementary Table S1. Bacteria were cultured in in LB  
247 medium (10 g/l tryptone, 5 g/l yeast extract, and 5 g/l NaCl), tryptone medium (10 g/l  
248 tryptone, 5 g/l NaCl), SOB medium (20 g/l tryptone, 5 g/l yeast extract, 0.5 g/l NaCl, 2.5 mM  
249 KCl, 10 mM MgCl<sub>2</sub>, pH7.0), or SOC (SOB with 0.4 % glucose). For plates, 15 g/l agar were added.  
250 Antibiotics were added to a final concentration of 50 µg/ml ampicillin, 15 µg/ml  
251 chloramphenicol, and 15 µg/ml kanamycin, as required; IPTG and L-arabinose, respectively,  
252 were added as described in the figures.

### 253 **Fluorescence microscopy**

254 For fluorescence microscopy transformants of *E. coli* strain U159 (U65 *hupA-mCherry<sub>FRT</sub>*  
255  $\Delta$ *pdeL<sub>FRT</sub>*) and its derivatives were inoculated to OD<sub>600</sub> of 0.08 in tryptone medium  
256 supplemented with appropriate antibiotics and grown at 37°C whilst shaking. Plasmid *P<sub>ara</sub>*  
257 directed expression of the transcription regulators was induced after one hour of growth by  
258 adding L-arabinose at the concentration stated in the figures. Bacteria were harvested just  
259 before induction (t = 1h), and one and two hours after induction (at t = 2h and t = 3h) by  
260 pelleting 500 µl of the culture by centrifugation at 5900 r.c.f. for 1 minute. The bacterial  
261 pellets were resuspended in 150 µl of fresh tryptone medium, and 4 µl of these suspensions  
262 were spotted onto 1% agarose pads for microscopy. Image acquisition was performed using  
263 Zeiss Axio Imager.M2 microscope with an EC Plan-Neofluar 100x/1.30 Oil Ph3 M27 objective.  
264 Images were captured and processed using ZEN 2012 software (Carl Zeiss Microscopy GmbH,  
265 Germany). Excitation times were 500 ms for PdeL-mVenus fusions, MukB-mNG, FtsZ-mNG  
266 and HupA-mCherry. Contrast settings were 1-16384 for phase contrast, 200-2000 for HupA-  
267 mCherry, 1-16384 for PdeL-mVenus, 180-300 for MukB-mNG and 180-1000 for FtsZ-mNG,  
268 unless otherwise stated in the figures.

## 269 **PdeL protein stability analyses**

270 For determining the protein stability of PdeL and its variants, transformants of *E. coli* strain  
271 U121 (U65  $\Delta pdeL_{FRT}$ ) with plasmids pKECY81 ( $P_{ara}$  *pdeL-3xFLAG*) and pKECY91 ( $P_{ara}$  *pdeL<sub>HTH5M</sub>-*  
272 *3xFLAG*) were inoculated to an OD<sub>600</sub> of 0.08 in tryptone medium supplemented with  
273 ampicillin. The transformants were grown for 2 hours at 37°C without induction of  $P_{ara}$  to  
274 preserve a low protein level for quantification by western blotting. Translation was blocked  
275 by adding chloramphenicol to a final concentration of 100 µg/ml. Samples of 2 ml volume  
276 were taken just prior and at several time points after inhibition of translation. Bacteria were  
277 pelleted by centrifugation and re-suspended in Laemmli buffer for detection of epitope-  
278 tagged protein by Western blotting (34)}.

## 279 **Protein detection by western blotting and coomassie staining**

280 SDS-PAGE, Coomassie staining, and Western blots were performed as described (34). Unless  
281 otherwise described, bacteria equivalent to an OD<sub>600</sub> of 0.08 were loaded per lane. Equal  
282 loading was validated by 2,2,2-trichloroethane (TCE) staining of total protein (35). Epitope-  
283 tagged 3xFLAG proteins were detected using primary antibody anti-FLAG M2 from mouse  
284 (diluted 1:4,000, catalogue number F3165; Sigma Aldrich, Germany) and Alexa Fluor 680  
285 fluorescent dye-labeled secondary anti-mouse antibody from goat (diluted 1:10,000,  
286 catalogue number A21057; Thermo Scientific, Germany). Quantification of protein bands was  
287 performed with Odyssey V3.0 software for Western blots and with ImageLab (BioRad,  
288 Germany) for Coomassie stained gels.

## 289 References

- 290 1. Pérez-Rueda E, Collado-Vides J. 2000. The repertoire of DNA-binding transcriptional  
291 regulators in *Escherichia coli* K-12. *Nucleic Acids Res* 28:1838-1847.
- 292 2. Santos-Zavaleta A, Salgado H, Gama-Castro S, Sánchez-Pérez M, Gómez-Romero L,  
293 Ledezma-Tejeida D, García-Sotelo JS, Alquicira-Hernández K, Muñiz-Rascado LJ, Peña-  
294 Loredo P, Ishida-Gutiérrez C, Velázquez-Ramírez DA, Del Moral-Chávez V, Bonavides-  
295 Martínez C, Méndez-Cruz C-F, Galagan J, Collado-Vides J. 2018. RegulonDB v 10.5:  
296 tackling challenges to unify classic and high throughput knowledge of gene regulation  
297 in *E. coli* K-12. *Nucleic Acids Res* 47:D212-D220.
- 298 3. Gao Y, Lim HG, Verkler H, Szubin R, Quach D, Rodionova I, Chen K, Yurkovich JT, Cho  
299 B-K, Palsson Bernhard O. 2021. Unraveling the functions of uncharacterized  
300 transcription factors in *Escherichia coli* using ChIP-exo. *Nucleic Acids Res* 49:9696-  
301 9710.
- 302 4. Shimada T, Ishihama A, Busby SJW, Grainger DC. 2008. The *Escherichia coli* RutR  
303 transcription factor binds at targets within genes as well as intergenic regions. *Nucleic*  
304 *Acids Res* 36:3950-3955.
- 305 5. Ishihama A, Shimada T, Yamazaki Y. 2016. Transcription profile of *Escherichia coli*:  
306 genomic SELEX search for regulatory targets of transcription factors. *Nucleic Acids Res*  
307 44:2058-2074.
- 308 6. Shimada T, Ogasawara H, Ishihama A. 2018. Single-target regulators form a minor  
309 group of transcription factors in *Escherichia coli* K-12. *Nucleic Acids Res* 46:3921-3936.
- 310 7. Dame RT, Rashid F-ZM, Grainger DC. 2020. Chromosome organization in bacteria:  
311 mechanistic insights into genome structure and function. *Nat Rev Genet* 21:227-242.
- 312 8. Reinders A, Hee C-S, Ozaki S, Mazur A, Boehm A, Schirmer T, Jenal U. 2016. Expression  
313 and genetic activation of cyclic di-GMP-specific phosphodiesterases in *Escherichia coli*.  
314 *J Bacteriol* 198:448-462.
- 315 9. Yilmaz C, Rangarajan AA, Schnetz K. 2020. The transcription regulator and c-di-GMP  
316 phosphodiesterase PdeL represses motility in *Escherichia coli*. *J Bacteriol*  
317 203:JB.00427-20.
- 318 10. Rangarajan AA, Schnetz K. 2018. Interference of transcription across H-NS binding  
319 sites and repression by H-NS. *Mol Microbiol* 108:226-239.
- 320 11. Hengge R. 2016. Trigger phosphodiesterases as a novel class of c-di-GMP effector  
321 proteins. *Philos Trans R Soc Lond B Biol Sci* 371:20150498.
- 322 12. Breddermann H, Schnetz K. 2016. Correlation of antagonistic regulation of *leuO*  
323 transcription with the cellular levels of BglJ-RcsB and LeuO in *Escherichia coli*. *Front*  
324 *Cell Infect Microbiol* 6:106.
- 325 13. Khlebnikov A, Risa Ø, Skaug T, Carrier TA, Keasling JD. 2000. Regulatable arabinose-  
326 inducible gene expression system with consistent control in all cells of a culture. *J*  
327 *Bacteriol* 182:7029-7034.
- 328 14. Wery M, Woldringh CL, Rouviere-Yaniv J. 2001. HU-GFP and DAPI co-localize on the  
329 *Escherichia coli* nucleoid. *Biochimie* 83:193-200.
- 330 15. Marceau AH, Bahng S, Massoni SC, George NP, Sandler SJ, Mariani KJ, Keck JL. 2011.  
331 Structure of the SSB-DNA polymerase III interface and its role in DNA replication.  
332 *EMBO J* 30:4236-4247.

- 333 16. Niki H, Jaff, A, Imamura R, Ogura T, Hiraga S. 1991. The new gene *mukB* codes for a  
334 177 kd protein with coiled-coil domains involved in chromosome partitioning of *E.coli*  
335 EMBO J 10:183-193.
- 336 17. Danilova O, Reyes-Lamothe R, Pinskaya M, Sherratt D, Possoz C. 2007. MukB  
337 colocalizes with the *oriC* region and is required for organization of the two *Escherichia*  
338 *coli* chromosome arms into separate cell halves. Mol Microbiol 65:1485-1492.
- 339 18. Badrinarayanan A, Reyes-Lamothe R, Uphoff S, Leake MC, Sherratt DJ. 2012. In Vivo  
340 Architecture and Action of Bacterial Structural Maintenance of Chromosome Proteins.  
341 Science 338:528-531.
- 342 19. Mäkelä J, Sherratt DJ. 2020. Organization of the *Escherichia coli* Chromosome by a  
343 MukBEF Axial Core. Mol Cell 78:250-260.e5.
- 344 20. Bernhardt TG, de Boer PAJ. 2005. SlmA, a Nucleoid-Associated, FtsZ Binding Protein  
345 Required for Blocking Septal Ring Assembly over Chromosomes in *E. coli*. Mol Cell  
346 18:555-564.
- 347 21. Lewis M. 2005. The *lac* repressor. Comptes Rendus Biologies 328:521-548.
- 348 22. Son B, Patterson-West J, Arroyo-Mendoza M, Ramachandran R, Iben James R, Zhu J,  
349 Rao V, Dimitriadis Emiliou K, Hinton Deborah M. 2021. A phage-encoded nucleoid  
350 associated protein compacts both host and phage DNA and derepresses H-NS  
351 silencing. Nucleic Acids Res 49:9229-9245.
- 352 23. Thompson MK, Necedal I, Culviner PH, Zhang T, Gozzi KR, Laub MT. 2021. *Escherichia*  
353 *coli* SymE is a DNA-binding protein that can condense the nucleoid. Mol Microbiol  
354 <https://doi.org/10.1111/MMI.14877>.
- 355 24. Spurio R, Dörrenberger M, Falconi M, La Teana A, Pon CL, Gualerzi CO. 1992. Lethal  
356 overproduction of the *Escherichia coli* nucleoid protein H-NS: Ultramicroscopic and  
357 molecular autopsy. MolGenGenet 231:201-211.
- 358 25. Patterson-West J, Tai C-H, Son B, Hsieh M-L, Iben JR, Hinton DM. 2021. Overexpression  
359 of the Bacteriophage T4 *motB* Gene Alters H-NS Dependent Repression of Specific  
360 Host DNA. Viruses 13:84.
- 361 26. Talukder AA, Iwata A, Nishimura A, Ueda S, Ishihama A. 1999. Growth Phase-  
362 Dependent Variation in Protein Composition of the *Escherichia coli* Nucleoid. J  
363 Bacteriol 181:6361-6370.
- 364 27. Lioy VS, Junier I, Bocard F. 2021. Multiscale Dynamic Structuring of Bacterial  
365 Chromosomes. Annu Rev Microbiol 75:541-561.
- 366 28. Wu LJ, Errington J. 2012. Nucleoid occlusion and bacterial cell division. Nat Rev  
367 Microbiol 10:8-12.
- 368 29. Gao R, Helfant LJ, Wu T, Li Z, Brokaw SE, Stock Ann M. 2021. A balancing act in  
369 transcription regulation by response regulators: titration of transcription factor  
370 activity by decoy DNA binding sites. Nucleic Acids Res 49:11537-11549.
- 371 30. Wilson GG, Young KYK, Edlin GJ, Konigsberg W. 1979. High-frequency generalised  
372 transduction by bacteriophage T4. Nature 280:80-82.
- 373 31. Miller JH. 1992. A short course in bacterial genetics. A laboratory manual and  
374 handbook for *Escherichia coli* and related bacteria. Cold Spring Harbor Laboratory  
375 Press, Plainview, New York, USA.
- 376 32. Datsenko KA, Wanner BL. 2000. One-step inactivation of chromosomal genes in  
377 *Escherichia coli* K-12 using PCR products. Proc Natl Acad Sci USA 97:6640-6645.
- 378 33. Uzzau S, Figueroa-Bossi N, Rubino S, Bossi L. 2001. Epitope tagging of chromosomal  
379 genes in *Salmonella*. Proc Natl Acad Sci USA 98:15264-15269.

- 380 34. Sambrook J, Russell D. 2001. Molecular cloning: a laboratory manual, vol 3. Cold Spring  
381 Harbor Laboratory Press, Cold Spring Harbor, NY.
- 382 35. Ladner CL, Yang J, Turner RJ, Edwards RA. 2004. Visible fluorescent detection of  
383 proteins in polyacrylamide gels without staining. *Anal Biochem* 326:13-20.
- 384 36. Pannen D, Fabisch M, Gausling L, Schnetz K. 2016. Interaction of the RcsB response  
385 regulator with auxiliary transcription regulators in *Escherichia coli*. *J Biol Chem*  
386 291:2357-2370.
- 387 37. Guzman LM, Belin D, Carson MJ, Beckwith J. 1995. Tight regulation, modulation, and  
388 high-level expression by vectors containing the arabinose  $P_{BAD}$  promoter. *J Bacteriol*  
389 177:4121-4130.
- 390 38. Cherepanov PP, Wackernagel W. 1995. Gene disruption in *Escherichia coli*: TcR and  
391 KmR cassettes with the option of Flp-catalyzed excision of the antibiotic-resistance  
392 determinant. *Gene* 158:9-14.
- 393 39. Venkatesh GR, Kembou Koungni FC, Paukner A, Stratmann T, Blissenbach B, Schnetz  
394 K. 2010. BglJ-RcsB heterodimers relieve repression of the *Escherichia coli bgl* operon  
395 by H-NS. *J Bacteriol* 192:6456-6464.
- 396 40. Fragel SM, Montada A, Heermann R, Baumann U, Schacherl M, Schnetz K. 2019.  
397 Characterization of the pleiotropic LysR-type transcription regulator LeuO of  
398 *Escherichia coli*. *Nucleic Acids Res* 47:7363-7379.
- 399



## 400 Tables

Table 1: E. coli K12 strains

| Strain                                | Genotype                                                                                                                                            | Reference/Construction <sup>a</sup>   |
|---------------------------------------|-----------------------------------------------------------------------------------------------------------------------------------------------------|---------------------------------------|
| T1241                                 | BW30270 <i>ilvG</i> <sup>+</sup> <i>flhDC</i> (IS1); motile                                                                                         | (36)                                  |
| <u>Donor strains for transduction</u> |                                                                                                                                                     |                                       |
| T2817                                 | T1241 <i>mukB-3xFLAG</i> <sub>kan</sub>                                                                                                             | T1241/pKD46 x<br>OB68/OB69 (pSUB11)   |
| T2818                                 | T1241 <i>mukB-mNG</i> <sub>cm</sub>                                                                                                                 | T1241/pKD46 x<br>OB66/OB67 (pKECY38)  |
| U98                                   | T1241 $\Delta$ <i>pdeL</i> <sub>cm</sub>                                                                                                            | (9)                                   |
| <u>U65 and derivatives</u>            |                                                                                                                                                     |                                       |
| U65                                   | T1241 $\Delta$ ( <i>araC-BAD</i> ) $\Delta$ <i>lac(I-ZYA)</i> <sub>FRT</sub> P <sub>cp8</sub> <i>araE</i> $\Delta$ <i>araFGH flhDC</i> <sup>+</sup> | (12)                                  |
| U119                                  | U65 $\Delta$ <i>pdeL</i> <sub>cm</sub>                                                                                                              | U65 x T4G77 (U98)                     |
| U121                                  | U65 $\Delta$ <i>pdeL</i> <sub>FRT</sub>                                                                                                             | U119 x pCP20                          |
| U148                                  | U65 $\Delta$ <i>pdeL</i> <sub>FRT</sub> <i>hupA-mCherry</i> <sub>kan</sub>                                                                          | U121/pKD46 x<br>OA484/OA485 (pKECY15) |
| U159                                  | U65 $\Delta$ <i>pdeL</i> <sub>FRT</sub> <i>hupA-mCherry</i> <sub>FRT</sub>                                                                          | U148 x pCP20                          |
| U471                                  | U65 $\Delta$ <i>pdeL</i> <sub>FRT</sub> <i>hupA-mCherry</i> <sub>FRT</sub> <i>mukB-mNG</i> <sub>cm</sub>                                            | U159 x P1vir(T2818)                   |
| U477                                  | U65 $\Delta$ <i>pdeL</i> <sub>FRT</sub> <i>hupA-mCherry</i> <sub>FRT</sub> <i>mukB-mNG</i> <sub>FRT</sub>                                           | U471 x pCP20                          |
| U466                                  | U65 <i>mukB-3xFLAG</i> <sub>kan</sub>                                                                                                               | U65 x P1vir(T2817)                    |
| U473                                  | U65 <i>mukB-3xFLAG</i> <sub>FRT</sub>                                                                                                               | U466 x pCP20                          |
| U467                                  | U65 $\Delta$ <i>pdeL</i> <sub>FRT</sub> <i>mukB-3xFLAG</i> <sub>kan</sub>                                                                           | U121 x P1vir(T2817)                   |
| U474                                  | U65 $\Delta$ <i>pdeL</i> <sub>FRT</sub> <i>mukB-3xFLAG</i> <sub>FRT</sub>                                                                           | U467 x pCP20                          |

<sup>a</sup> Strains were constructed by transduction, which is stated as “x phage[donor strain]”;  $\lambda$  Red recombineering, stated as “x PCR primer pair (template),” followed by Flp recombinase-catalyzed deletion of the resistance marker, “x pCP20”.

| <b>Table 2</b> | <b>Plasmids</b>                                                                           |                                                                              |
|----------------|-------------------------------------------------------------------------------------------|------------------------------------------------------------------------------|
| <b>Plasmid</b> | <b>Features<sup>a</sup></b>                                                               | <b>Construction/Reference<sup>b</sup></b>                                    |
| pBAD30         | <i>araC P<sub>ara</sub></i> MCS in p15A-ori; Amp <sup>R</sup>                             | (37)                                                                         |
| pCP20          | cl <sub>857</sub> P <sub>R</sub> flp in pSC101-rep <sup>ts</sup> Amp <sup>R</sup>         | (38)                                                                         |
| pKD3           | FRT- <i>cmR</i> -FRT in ori <sub>Rγ</sub> Amp <sup>R</sup>                                | (32)                                                                         |
| pKD4           | FRT- <i>kanR</i> -FRT in ori <sub>Rγ</sub> Amp <sup>R</sup>                               | (32)                                                                         |
| pKD46          | <i>araC P<sub>ara</sub></i> γ-β-exo in pSC101-rep <sup>ts</sup> Amp <sup>R</sup>          | (32)                                                                         |
| pSUB11         | 3xFLAG in pKD4                                                                            | (33)                                                                         |
| pKESK22        | <i>lacI<sup>q</sup> P<sub>tac</sub></i> MCS in p15A-ori; Kan <sup>r</sup>                 | (39)                                                                         |
| pKETS24        | <i>lacI P<sub>lacUV5</sub></i> in pSC-ori Cm <sup>R</sup>                                 | (40)                                                                         |
| pKESL165       | <i>lacI<sup>q</sup> P<sub>tac</sub> mVenus</i> in pKESK22                                 | (9)                                                                          |
| pKESL209       | <i>lacI<sup>q</sup> P<sub>tac</sub> pdeL<sub>H<sub>TH5M</sub></sub>-mVenus</i> in pKESK22 | (9)                                                                          |
| pKEHB12        | 3xFLAG in pBAD30                                                                          | 3xFLAG (annealed oligos T687/T906) in pBAD30                                 |
| pKEHB23        | <i>araC P<sub>ara</sub> mVenus</i> in pBAD30                                              | <i>mVenus</i> (pKESL165 EcoRI/XbaI) in pBAD30                                |
| pKEYCY1        | <i>araC P<sub>ara</sub> pdeL-mVenus</i> in pBAD30                                         | <i>pdeL</i> (T925/T952) in pKEHB23                                           |
| pKEYCY11       | <i>araC P<sub>ara</sub> pdeL<sub>H<sub>TH5M</sub></sub>-mVenus</i> in pBAD30              | <i>pdeL<sub>H<sub>TH5M</sub></sub></i> (T925/T952 from pKESL209) in pKEHB23  |
| pKEYCY15       | <i>mCherry</i> in pKD4                                                                    | <i>mCherry</i> (PCR OA480/OA481) in pKD4                                     |
| pKEYCY26       | <i>mNeonGreen</i> in pSC-ori Cm <sup>R</sup>                                              | (9)                                                                          |
| pKEYCY38       | <i>mNeonGreen</i> in pKD3                                                                 | <i>mNeonGreen</i> (Sall, BamHI from pKEYCY26)                                |
| pKEYCY43       | <i>ftsZ-mNeonGreen</i> in in pSC-ori Cm <sup>R</sup>                                      | <i>ftsZ</i> (PCR OA807/OA808) in pKEYCY26 (XbaI, NdeI)                       |
| pKEYCY44       | <i>araC P<sub>ara</sub> pdeL</i> in pBAD30                                                | (9)                                                                          |
| pKEYCY52       | <i>araC P<sub>ara</sub> pdeL<sub>H<sub>TH5M</sub></sub></i> in pBAD30                     | (9)                                                                          |
| pKEYCY53       | <i>araC P<sub>ara</sub> pdeL<sub>EVL-AAA</sub></i> in pBAD30                              | (9)                                                                          |
| pKEYCY81       | <i>araC P<sub>ara</sub> pdeL-3xFLAG</i> in pBAD30                                         | <i>pdeL</i> (T925/OA116) in pKEHB12                                          |
| pKEYCY90       | <i>lacI P<sub>lacUV5</sub> ftsZ-mNeonGreen</i> in pSC-ori Cm <sup>R</sup>                 | <i>ftsZ-mNeonGreen</i> (pKEYCY43 NcoI,XbaI) in pKETS24                       |
| pKEYCY91       | <i>araC P<sub>ara</sub> pdeL<sub>H<sub>TH5M</sub></sub>-3xFLAG</i> in pBAD30              | <i>pdeL<sub>H<sub>TH5M</sub></sub></i> (PCR T925/OA116, pKEYCY52) in pKEHB12 |
| pKEYCY92       | <i>araC P<sub>ara</sub> pdeL<sub>EVL-AAA</sub>-3xFLAG</i> in pBAD30                       | <i>pdeL<sub>EVL-AAA</sub></i> (PCR T925/OA116, pKEYCY53) in pKEHB12          |
| pKEYCY95       | <i>araC P<sub>ara</sub> rcsB-3xFLAG</i> (native-RBS) in pBAD30                            | <i>rcsB</i> (PCR T358/S866) in pKEHB12                                       |
| pKEYCY96       | <i>araC P<sub>ara</sub> rcsB-3xFLAG</i> ( <i>T7gene10</i> -RBS) in pBAD30                 | <i>rcsB</i> (PCR OB93/S866) in pKEHB12                                       |
| pKEYCY97       | <i>araC P<sub>ara</sub> rcsB-3xFLAG</i> ( <i>pdeL</i> -RBS) in pBAD30                     | <i>rcsB</i> (PCR OB94/S866) in pKEHB12                                       |
| pKEYCY98       | <i>araC P<sub>ara</sub> rcsB</i> ( <i>T7gene10</i> -RBS) in pBAD30                        | <i>rcsB</i> (PCR OB93/T106) in pBAD30                                        |
| pKEYCY99       | <i>araC P<sub>ara</sub> lacI</i> ( <i>T7gene10</i> -RBS) in pBAD30                        | <i>lacI</i> (PCR OB155/OB156) in pKEYCY98                                    |
| pKEYCY101      | <i>araC P<sub>ara</sub> rutR</i> ( <i>T7gene10</i> -RBS) in pBAD30                        | <i>rutR</i> (PCR OB159/OB160) in pKEYCY98                                    |
| pKEYCY102      | <i>araC P<sub>ara</sub> leuO</i> ( <i>T7gene10</i> -RBS) in pBAD30                        | <i>leuO</i> (PCR OA005/T558) in pKEYCY98                                     |
| pKEYCY103      | <i>araC P<sub>ara</sub> cra</i> ( <i>T7gene10</i> -RBS) in pBAD30                         | <i>cra</i> (PCR OB161/OB162) in pKEYCY98                                     |

<sup>a</sup> Features include Cm<sup>r</sup> (chloramphenicol resistance), Kan<sup>r</sup> (kanamycin resistance), MCS (multiple-cloning site), and pSC-rep<sup>ts</sup> (temperature-sensitive replication, derivative of pSC101).

<sup>b</sup> Cloning was verified by sequencing of the cloned PCR fragments.

## 402 Figures and Legends

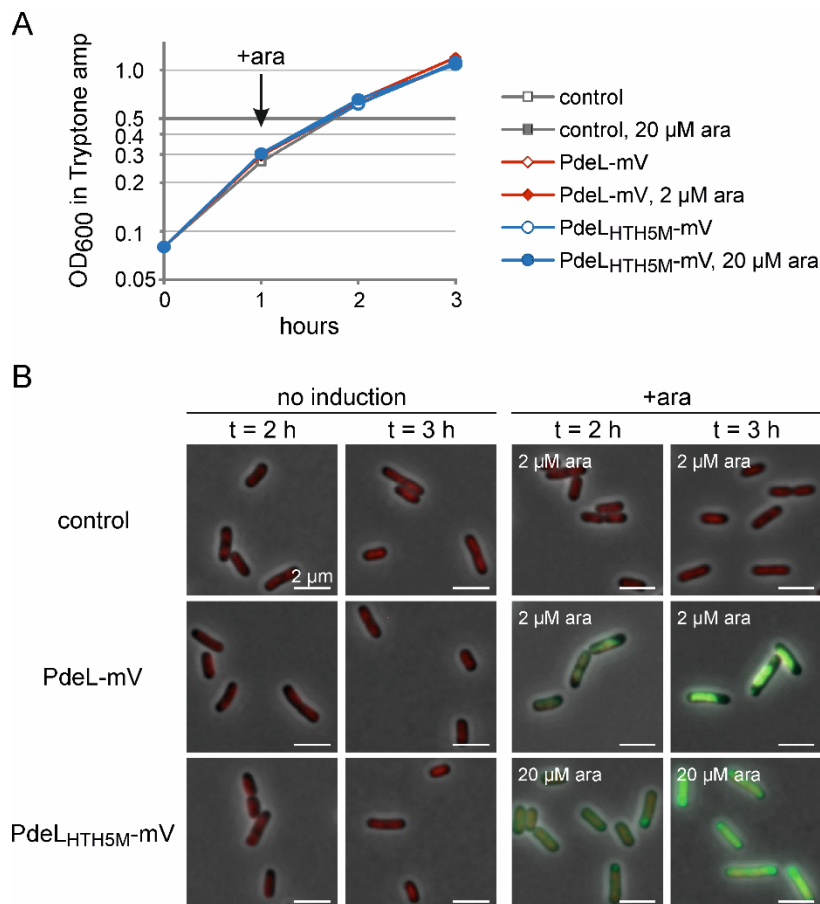

403

404 Figure 1 PdeL is nucleoid-associated. (A) Growth of transformants of *hupA-mCherry*  $\Delta$ *pdeL*  
405 strain U159 with plasmids pBAD30 (control), pKECY1 (PdeL-mV) and pKECY11 (PdeL<sub>H<sub>TH5M</sub></sub>-mV),  
406 respectively. Cultures were inoculated to OD<sub>600</sub> 0.08 and grown in tryptone ampicillin  
407 medium. After one hour of growth (t = 1 h), *P<sub>ara</sub>* directed expression was induced with L-  
408 arabinose using a final concentration of 2  $\mu$ M in case of *pdeL-mVenus* and 20  $\mu$ M in case of  
409 *pdeL<sub>H<sub>TH5M</sub></sub>-mVenus*. With these inducer concentrations steady state protein levels are similar  
410 as tested using 3xFLAG variants of PdeL and PdeL<sub>H<sub>TH5M</sub></sub> (Fig. S1). (B) Composite fluorescent  
411 microscopy images of representative bacteria with fluorescence of HupA-mCherry shown in  
412 red and of PdeL-mVenus or PdeL<sub>H<sub>TH5M</sub></sub>-mVenus (in green). Samples were harvested from un-  
413 induced and induced cultures at t = 2 h and t = 3 h. The scale bar corresponds to 2  $\mu$ m. Full  
414 images are shown in supplementary Figure S2.

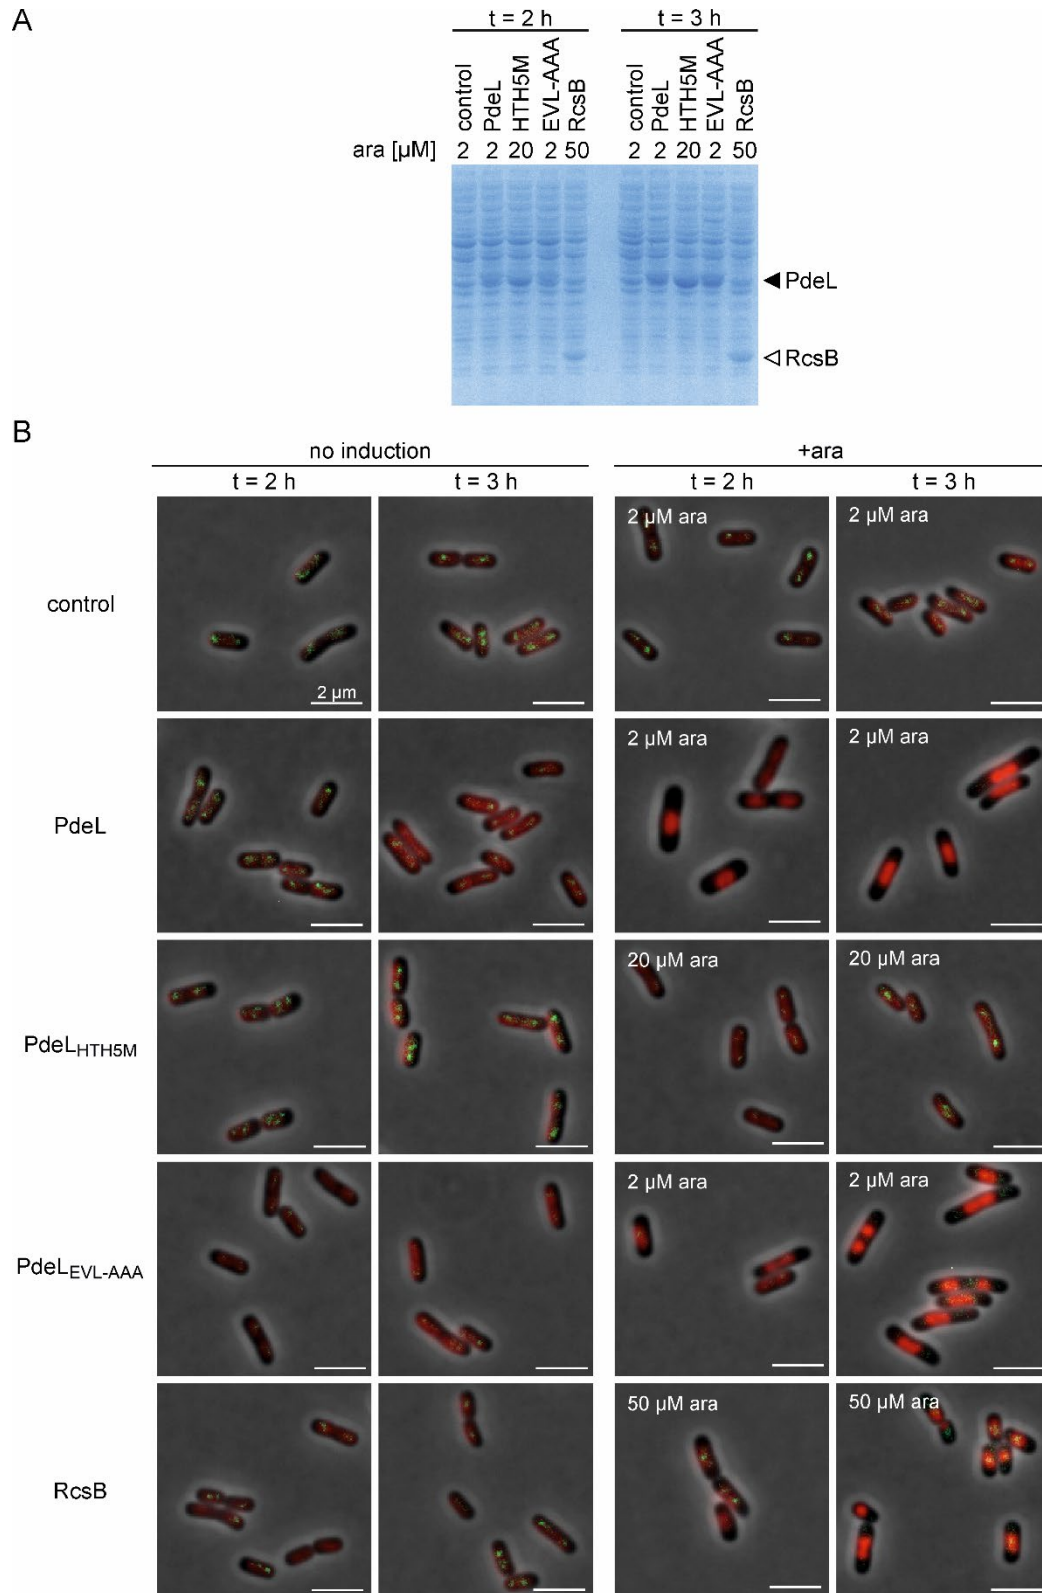

420 growth *P<sub>ara</sub>* directed expression of *pdeL* and its mutants as well as of *rscB* was induced by  
421 addition of L-arabinose, as indicated. Samples were harvested after 2 and 3 hours of growth  
422 (t = 2h, t= 3h). (A) Protein levels were analyzed by 15% SDS-PAGE and Coomassie staining.  
423 Bands corresponding to PdeL proteins and to RcsB are indicated, by filled and open triangles,  
424 respectively. (B) Representative sections of microscopy images of transformants expressing  
425 no protein (control), PdeL, PdeL<sub>H<sub>5</sub>M</sub>, PdeL<sub>EVL-AAA</sub>, and RcsB, respectively. HupA-mCherry  
426 fluorescence is shown in red and MukB-mNeonGreen foci are shown in green. Full size  
427 microscopy images are shown in Fig. S4.

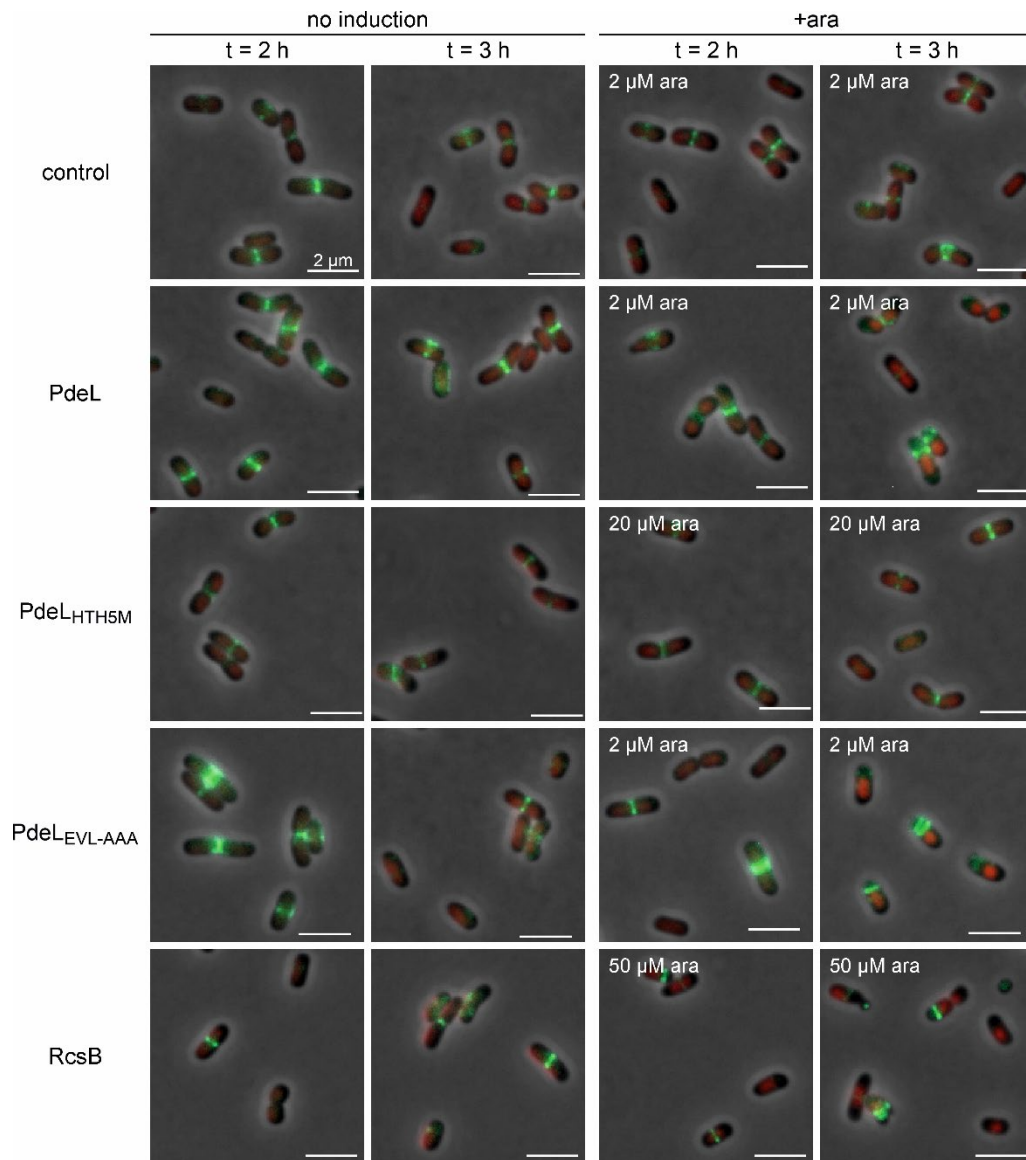

428

429 Figure 3: PdeL, PdeL<sub>EVL-AAA</sub> and RcsB misplace FtsZ rings. For visualization of the Z-ring a C-  
430 terminally mNeonGreen tagged FtsZ variant, FtsZ-mNG, was ectopically expressed under the  
431 control of *P<sub>lacUV5</sub>* promoter using low copy plasmid pKEY90. Co-transformants of *hupA-*  
432 *mCherry*  $\Delta$ *pdeL* strain U159 with plasmid pKEY90 (*P<sub>lacUV5</sub>* *ftsZ-mNG*) and plasmids pBAD30  
433 (control), pKEY44 (PdeL), pKEY52 (PdeL<sub>HTH5M</sub>), pKEY53 (PdeL<sub>EVL-AAA</sub>), and pKEY98 (RcsB),  
434 respectively, were grown in tryptone ampicillin chloramphenicol medium. After one hour of  
435 growth *P<sub>ara</sub>* directed expression was induced by L-arabinose, as indicated. Samples were  
436 harvested at t = 2 h and t = 3 h of growth. Shown are representative sections of composite  
437 microscopy images of transformants with HupA-mCherry (in red) and FtsZ-mNG (in green).  
438 Contrast settings for RcsB images were adjusted for better visibility of FtsZ-mNG to 180-700  
439 (mNG) and 200-2000 (mCherry). Full size images are shown in Fig. S6.

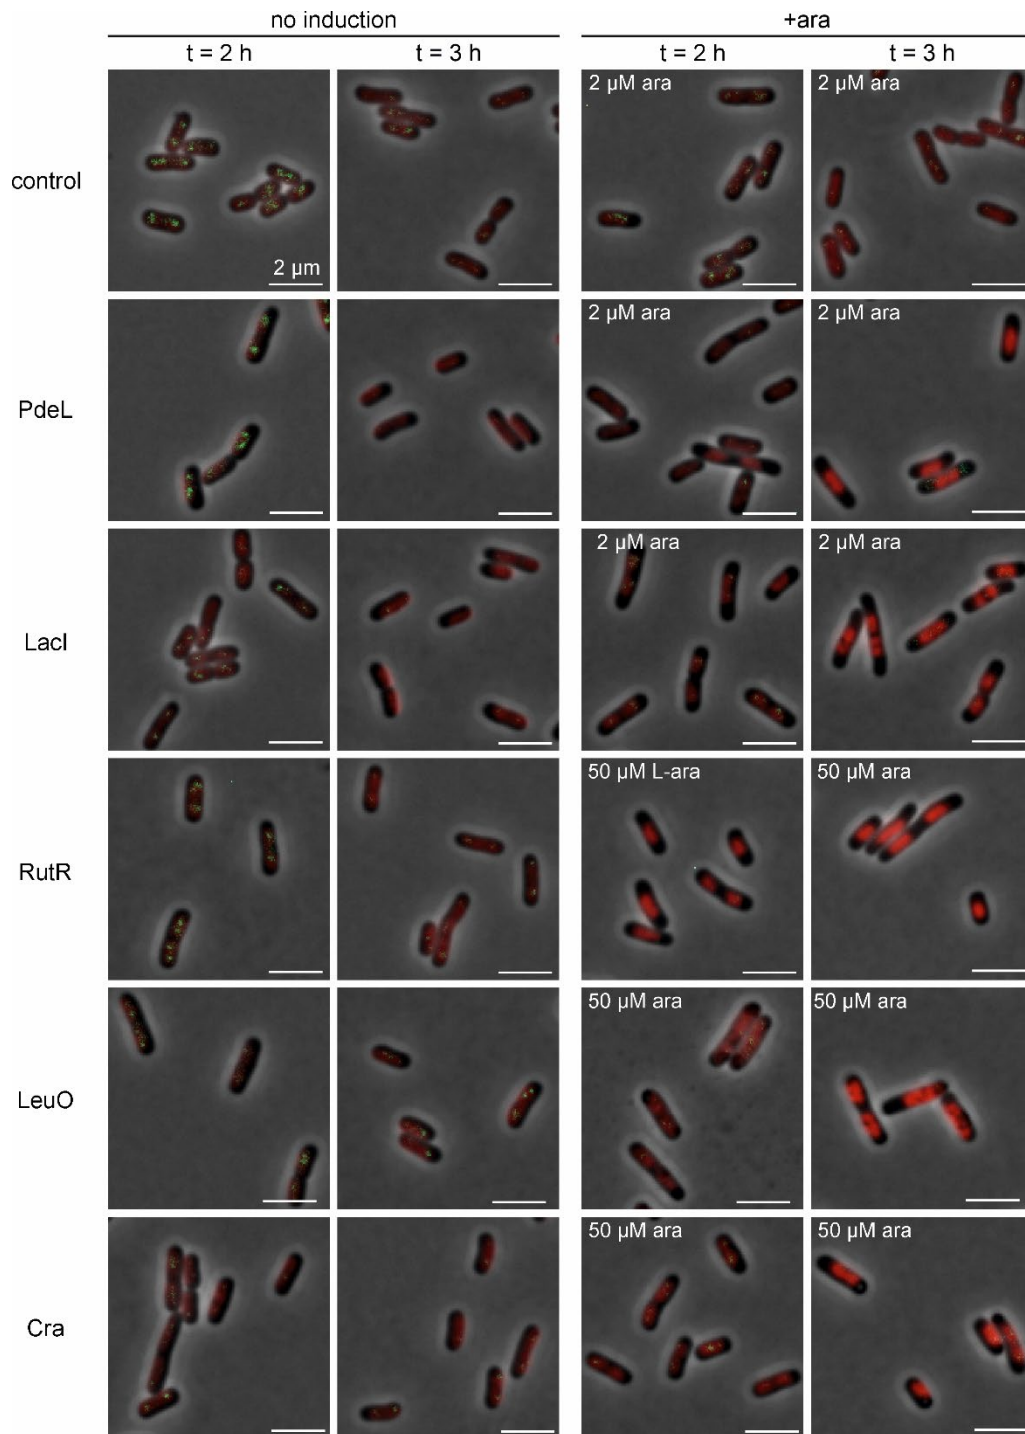

440

441 Figure 4: High levels of the transcription regulators LacI, RutR, LeuO, and Cra cause nucleoid  
442 compaction and loss of MukB foci. Transformants of *hupA-mCherry mukB-mNG ΔpdeL* strain  
443 U477 with plasmids pBAD30 (control), pKECY44 (PdeL), pKECY99 (LacI), pKECY101 (RutR),  
444 pKECY102 (LeuO), and pKECY103 (Cra) were grown in tryptone ampicillin medium. After one  
445 hour of growth, *P<sub>ara</sub>* directed expression of transcription regulators was induced with L-  
446 arabinose, as indicated. Expression of similar amounts of the transcription regulators was

447 analyzed SDS-PAGE (Fig. S7). Shown are representative composite microscopy images (full  
448 size images are shown in Fig. S8).

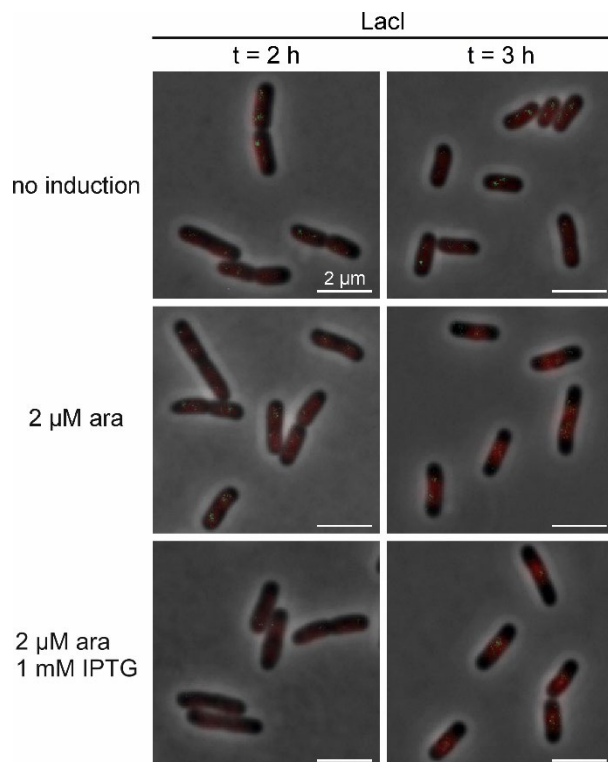

449

450 Figure 5: Non-specific DNA-binding by Lacl causes nucleoid compaction. To test whether non-  
451 specific DNA-binding by Lacl causes nucleoid compaction IPTG was added as well to cultures  
452 of transformants of *hupA-mCherry mukB-mNG ΔpdeL* strain U477 with plasmid pKECY99  
453 (Lacl). After one hour of growth in tryptone ampicillin medium *lacI* expression was induced  
454 with 2 μM L-arabinose and IPTG was supplemented to a final concentration of 1 mM, where  
455 indicated. Samples were harvested after one (t = 2h) and two (t = 3h) hours of growth. Shown  
456 are representative composite microscopy images; full size images are shown in Fig. S9.



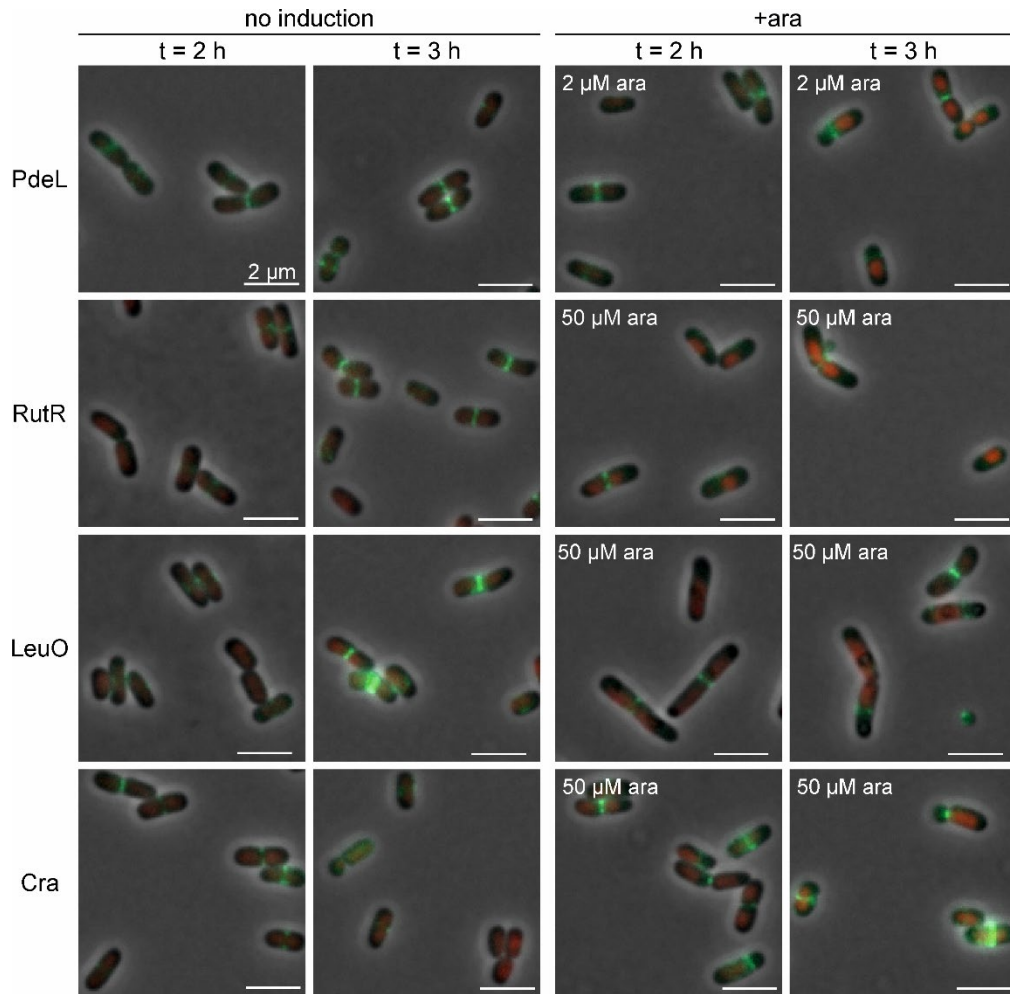

457

458 Figure 6: Cell division protein FtsZ is misplaced upon overexpression of transcription  
459 regulators RutR, LeuO and Cra. Co-transformants of *hupA-mCherry*  $\Delta pdeL$  strain U159 with  
460 plasmids pKECY90 (FtsZ-mNG) and pKECY44 (PdeL), pKECY101 (RutR), pKECY102 (LeuO) and  
461 pKECY103 (Cra) were grown in tryptone medium supplemented with chloramphenicol and  
462 ampicillin. After one hour of growth  $P_{ara}$  directed expression of transcription regulators genes  
463 were induced with L-arabinose, as indicated, and samples were harvested after two (t = 2 h)  
464 and three (t = 3h) hours of growth. Representative composite microscopy images with FtsZ-  
465 mNG (shown in green) and HupA-mCherry (in red). Full size images are shown in Fig. S10.
